# Supplementary material for: Influence of Physicochemical Factors on Adsorption of Ten Shigella flexneri Phages
Source: MDPI journal article supplement (doi:10.3390/v14122815), 2022-12-16
Supplement: s1 [file s1]

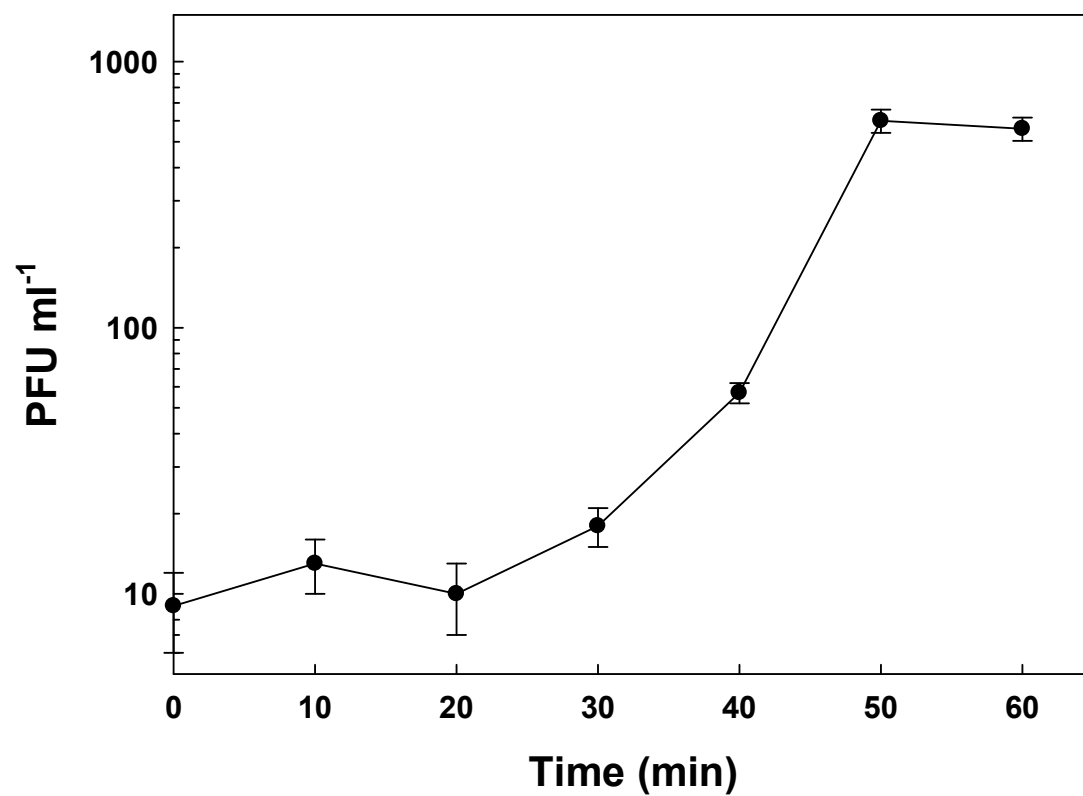

**Figure S1.** One-step growth curve in TSB at 37°C on ATCC12022 viable cells. A representative curve (phage Shi22) is shown since a similar behavior was found for all the phages evaluated. Values are the mean  $\pm$  standard deviation (error bars) of three determinations.
